# Supplementary material
Source: MDPI journal article supplement (https://www.mdpi.com/2077-0472/11/12/1298)
Supplement: s1 [file s1 › agriculture-1518110-supplementary.pdf]

[Supplemental figures]

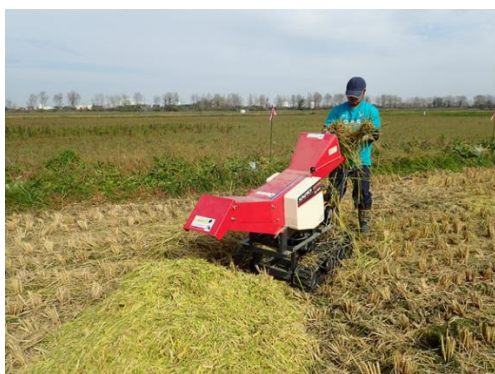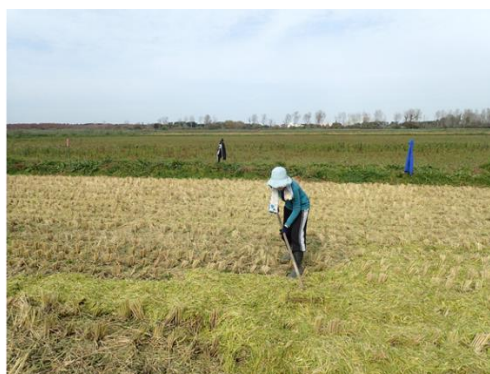

**Figure S1.** Cutting and spreading rice straw (27 October 2017).

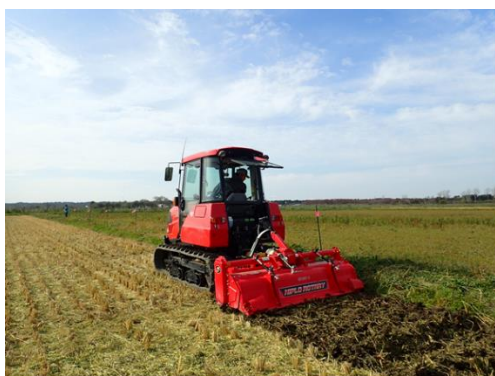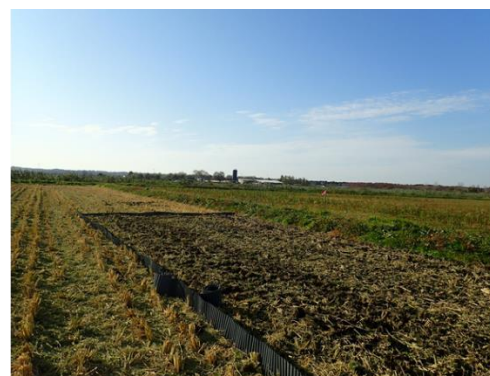

← Spring plowing plots  
(No plowing in autumn) | Autumn plowing  
plots →

**Figure S2.** Autumn plowing (27 October 2017).

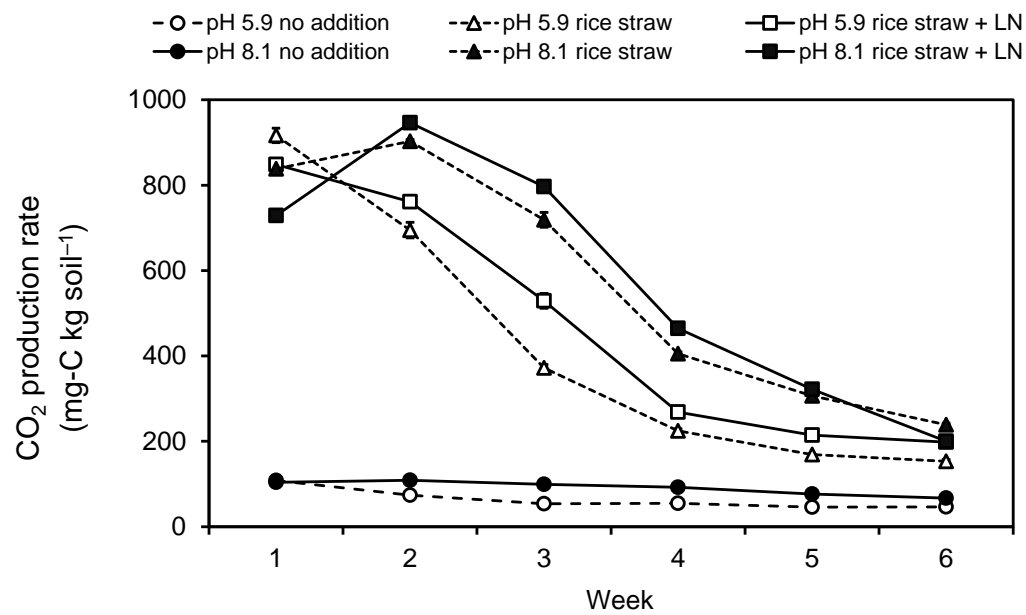

**Figure S3.** Time course of CO<sub>2</sub> production rate in the incubation experiment for rice straw decomposition. LN, lime nitrogen.

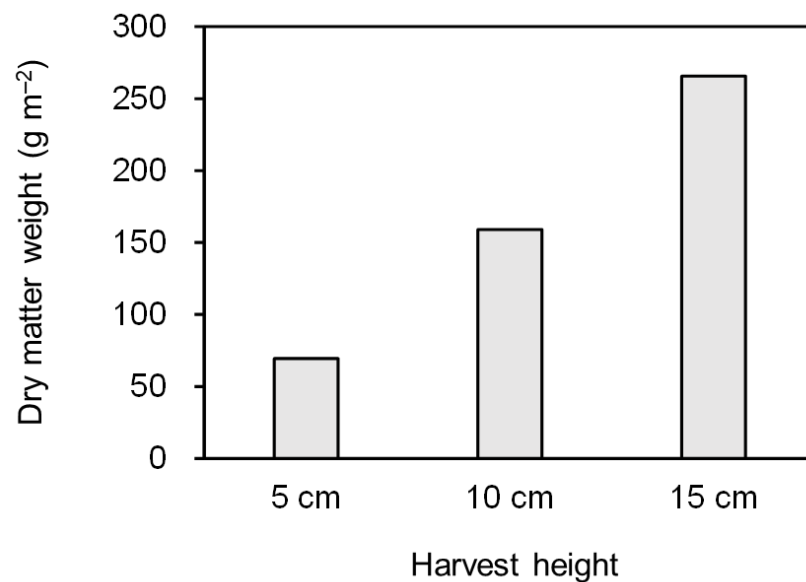

**Figure S4.** Dry matter weight of stubble at different harvest heights.

Harvested at 30-Sep 2016. Cultivar: Akitakomachi.
